# Supplementary material for: Electrocatalytic activity of NiO on silicon nanowires with a carbon shell and its application in dye-sensitized solar cell counter electrodes
Source: Royal Society of Chemistry journal article supplement (doi:10.1039/c5nr08265j), 2016-01-01
Supplement: c5nr08265j1.pdf [file c5nr08265j1.pdf]

## Supporting Information

Electrocatalytic activity of NiO on silicon nanowires with a carbon shell and its application to dye-sensitized solar cell counter electrodes

*Junhee Kim<sup>a,1</sup>, Cholong Jung<sup>b,1</sup>, Minsoo Kim<sup>a</sup>, Soomin Kim<sup>a</sup>, Yoonmook Kang<sup>c</sup>, Hae-seok Lee<sup>a</sup>, Jeunghee Park<sup>d</sup>, Yongseok Jun<sup>e,\*</sup>, and Donghwan Kim<sup>a,\*</sup>*

<sup>a</sup>Department of Materials Science and Engineering, Korea University, Anam-dong, Seongbuk-gu, Seoul 137-713, Korea  
E-mail: donghwan@korea.ac.kr

<sup>b</sup>Department of Chemical Engineering, UNIST, Banyeon, Ulju, Ulsan, 689-798, Korea

<sup>c</sup>KU· KIST Green School, Graduate School of Energy and Environment, Korea University, Anam-dong, Seongbuk-gu, Seoul 137-713, Korea

<sup>d</sup>Department of Chemistry, Korea University, Jochiwon 339-700, Korea

<sup>e</sup>Department of Materials Chemistry and Engineering, Konkuk University, Hwayang, Gwangjin, Seoul 143-701, Korea  
E-mail: yjun@konkuk.ac.kr

<sup>1</sup>These authors contributed equally to this work.

## J-V curve scanning detail.

The JV scanning was performed at forward scanning direction, starting from 0.08 V to  $V_{oc}$ . The voltage step is 3 mV and interval time is 50 msec. Total points are around 250 depending on  $V_{oc}$ .

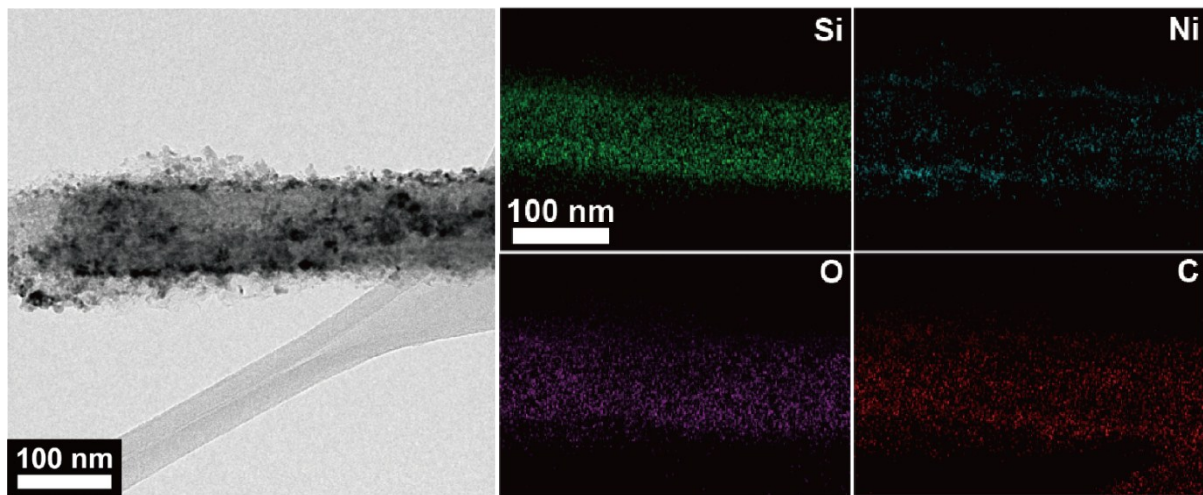

**Figure S1.** Transmission electron microscopy micrographs of a SiNW/C@NiO, and energy dispersive spectroscopy elemental mapping images of Si, Ni, O, and C.

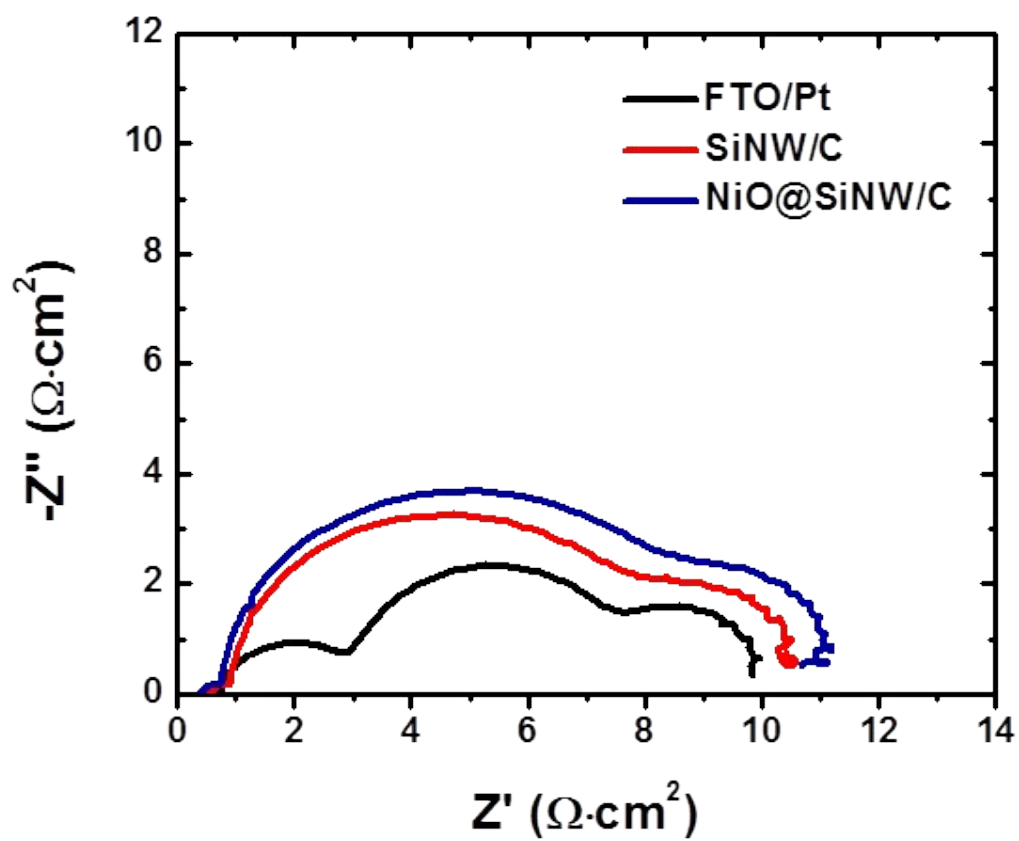

**Figure S2.** Electrochemical impedance spectroscopy for full dye-sensitized solar cells using Pt, SiNW/C, and NiO@SiNW/C as the counter electrodes.

**Table S1.** Photovoltaic parameters of dye-sensitized solar cells based on FTO/Pt, SiNW/C, and NiO@SiNW/C counter electrodes measured under AM1.5G illumination and electrochemical impedance spectroscopy parameters fitted from the equivalent circuit.

| Counter Electrode | $V_{oc}$<br>[V] | $J_{sc}$<br>[mA/cm <sup>2</sup> ] | FF<br>[%] | $\eta$<br>[%] | $R_s^{a)}$<br>[ $\Omega \cdot \text{cm}^2$ ] | $R_{ct}^{a)}$<br>[ $\Omega \cdot \text{cm}^2$ ] | $Z_n^{a)}$<br>[ $\Omega \cdot \text{cm}^2$ ] |
|-------------------|-----------------|-----------------------------------|-----------|---------------|----------------------------------------------|-------------------------------------------------|----------------------------------------------|
| FTO/Pt            | 0.762           | 16.55                             | 68.4      | 8.62          | 0.60                                         | 0.46                                            | 0.27                                         |
| SiNW/C            | 0.744           | 17.68                             | 65.9      | 8.67          | 0.17                                         | 0.23                                            | 0.29                                         |
| NiO@SiNW/C        | 0.759           | 18.52                             | 67.5      | 9.49          | 0.19                                         | 0.07                                            | 0.25                                         |

<sup>a)</sup> Obtained from symmetric cells

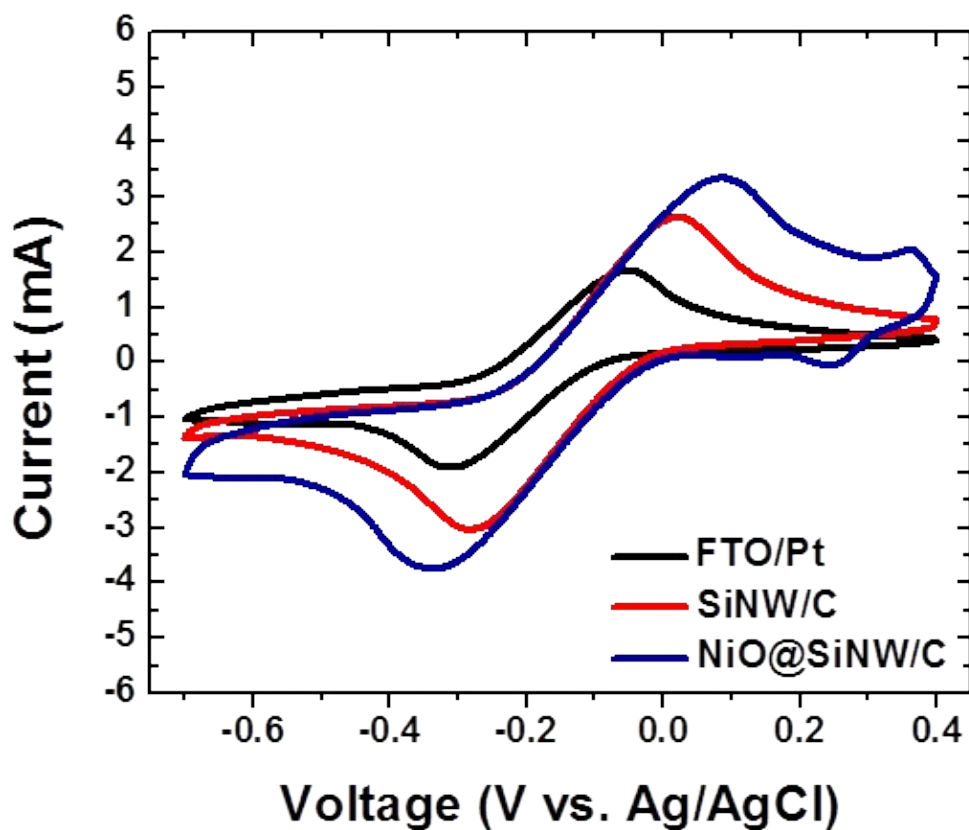

**Figure S3.** Cyclic voltammety curves of FTO/Pt, SiNW/C, and NiO@SiNW/C electrodes in  $5 \times 10^{-3}$  M  $K_3Fe(CN)_6$ / 0.1 M KCl solution at scan rate of  $50 \text{ mV s}^{-1}$ .

**Table S2.** Calculated electroactive surface area values of FTO/Pt, SiNW/C, and NiO@SiNW/C electrodes.

| Counter Electrode   | FTO/Pt | SiNW/C | NiO@SiNW/C |
|---------------------|--------|--------|------------|
| A ( $\text{cm}^2$ ) | 2.132  | 3.391  | 4.290      |

The tested area is  $1.0 \times 1.5 \text{ cm}^2$ .

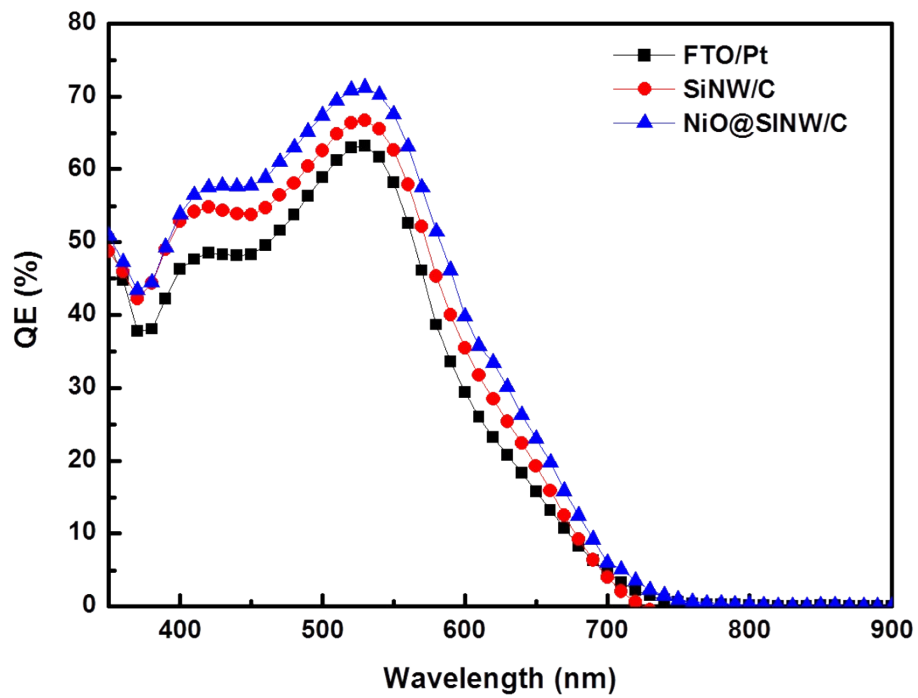

**Figure S4.** The incident photon-to-current conversion efficiencies(IPCEs) spectra for FTO/Pt, SiNW/C, and NiO@SiNW/C electrodes.

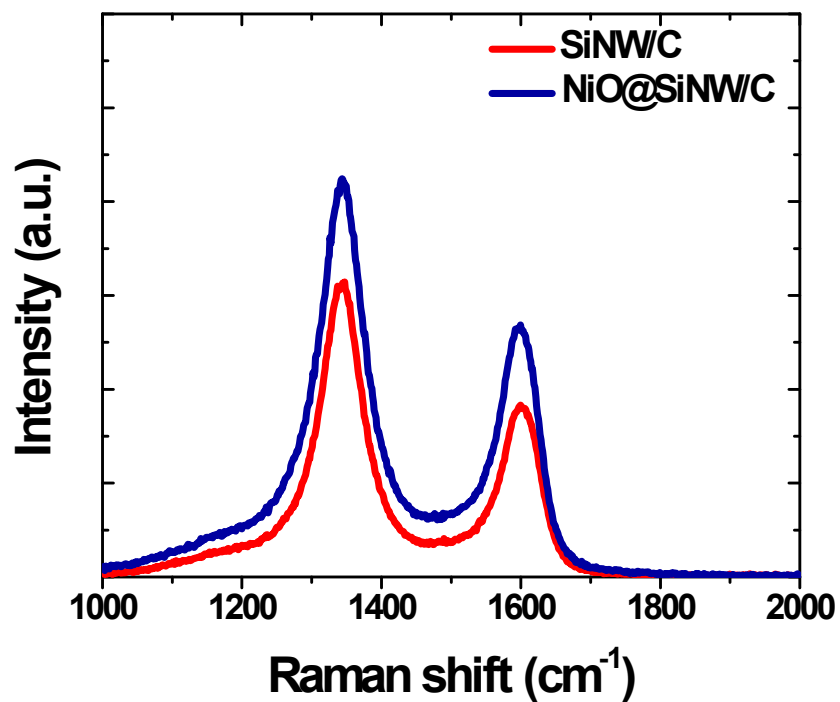

**Figure S5.** Raman spectra for SiNW/C and NiO@SiNW/C.

**Table S2.** Peak positions of D and G bands and  $I_D/I_G$  ratios.

|            | D band<br>( $\text{cm}^{-1}$ ) | G band<br>( $\text{cm}^{-1}$ ) | $I_D/I_G$ |
|------------|--------------------------------|--------------------------------|-----------|
| NiO@SiNW/C | 1343                           | 1599                           | 1.58      |
| SiNW/C     | 1343                           | 1599                           | 1.71      |
